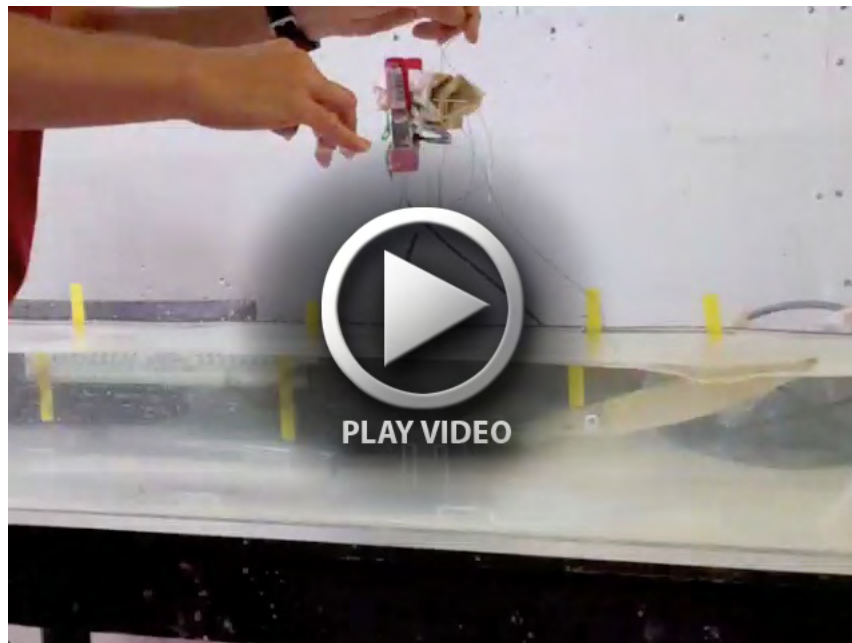

**Movie 1. Escape jet.** Two escape jets performed by an adult *Doryteuthis pealeii*. The sonomicrometry transducer leads are visible in the experimenter's hand.

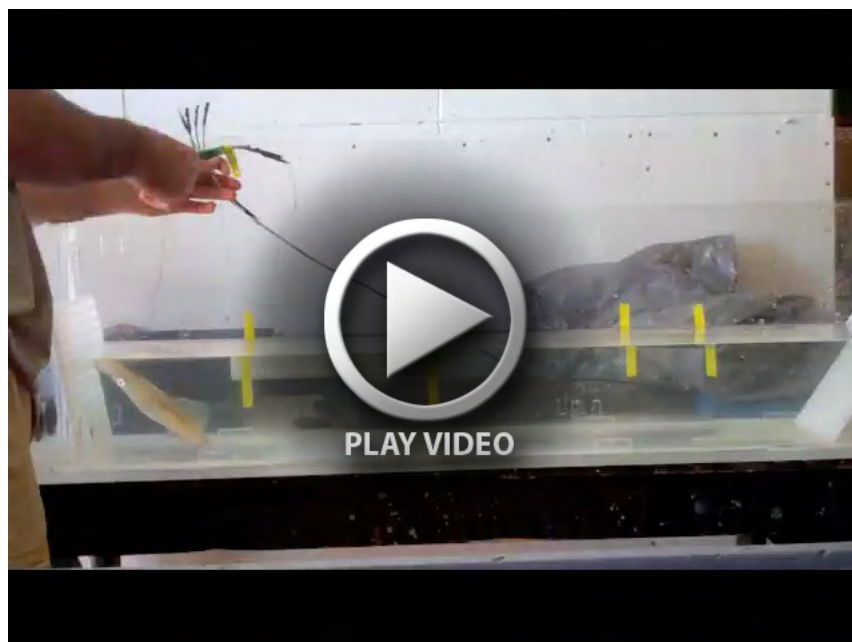

**Movie 2. Slow swimming.** Slow (i.e. less than 1.0 dorsal mantle lengths per second) rearward and forward swimming by an adult *Doryteuthis pealeii*. The sonomicrometry transducer leads are visible in the experimenter's hand.
